# Supplementary material
Source: PubMed Central journal article supplement (PMC6522227)
Supplement: NIHMS1518498-supplement-1.pdf [file NIHMS1518498-supplement-1.pdf]

## Supplementary Figure 1

This figure contains uncropped scans of western blots displayed in Extended Data Figures in the paper.

## Supplementary Tables

**Supplementary Table 1** | Summary of antibody information use in this study.

**Supplementary Table 2** | Summary of patients' sample information in this study.

**Supplementary Table 3** | Summary of sequencing samples mapping information in this study.

**Supplementary Table 4** | Summary of Ribosome profiling seq results for WT and *Ythdf1*<sup>-/-</sup> DCs. n = 4 (two conditions × two biological replicates), P values were calculated by two-sided likelihood ratio test and adjusted by Benjamini & Hochberg method.

Sheet 1 | List of translation efficiency for transcripts in WT and *Ythdf1*<sup>-/-</sup> Flt3L-DCs.

Sheet 2 | List of translation efficiency for transcripts in WT and *Ythdf1*<sup>-/-</sup> GMDCs.
