# Supplementary material
Source: PubMed Central journal article supplement (PMC6522227)

# Supplementary Figure 1

## Extended Data Fig. 1c

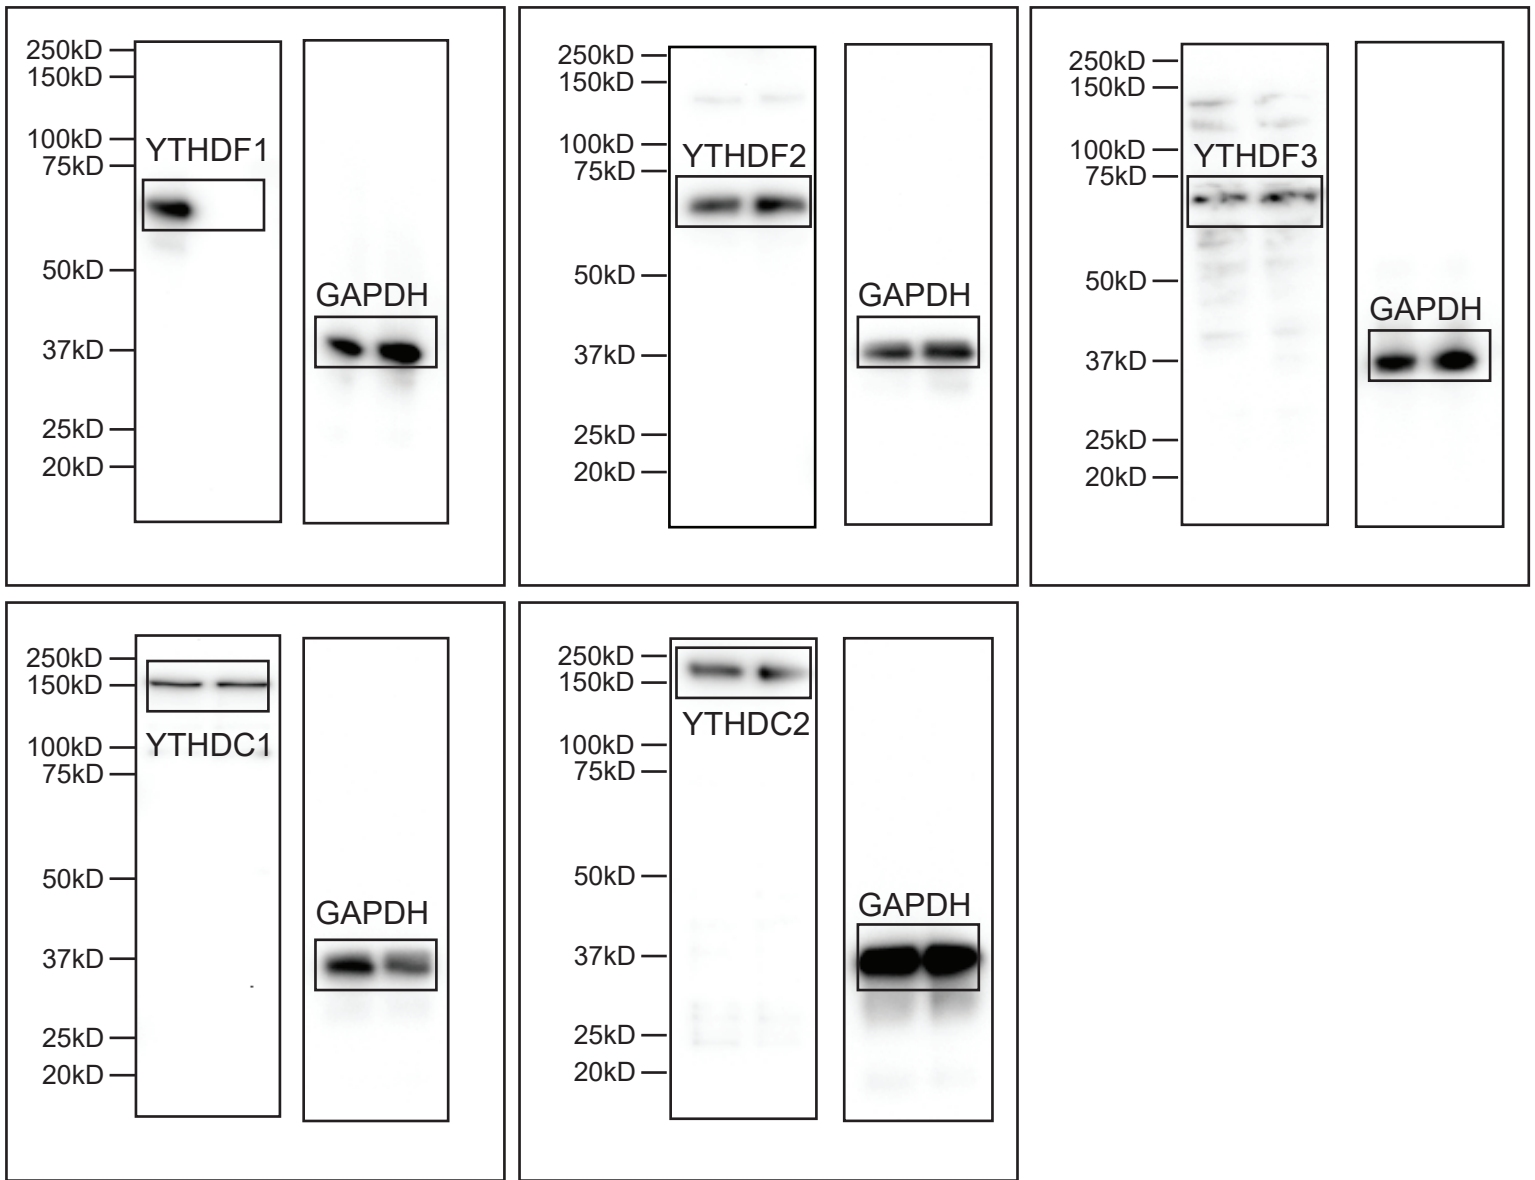

## Extended Data Fig. 8a

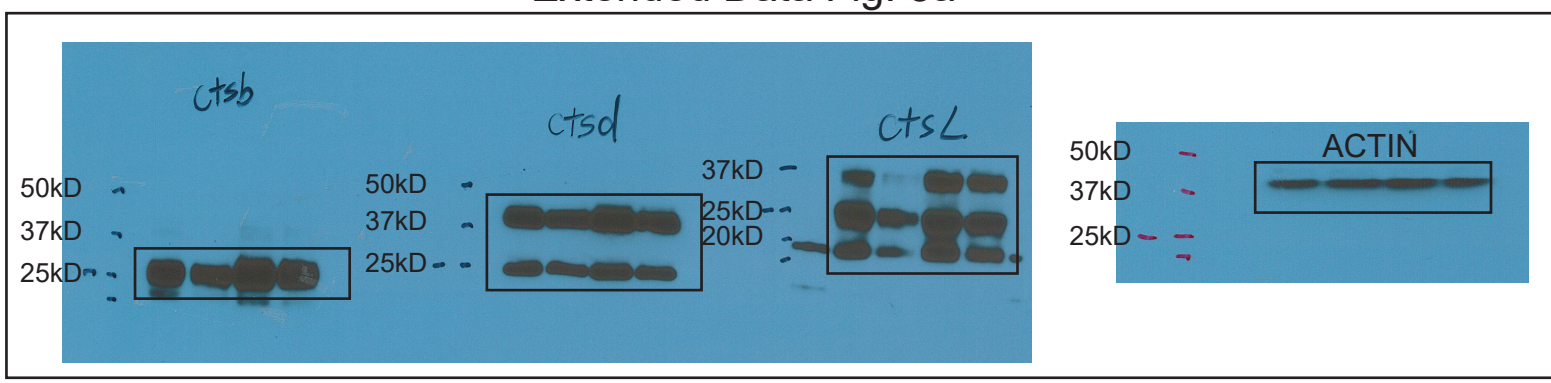

## Extended Data Fig. 8c

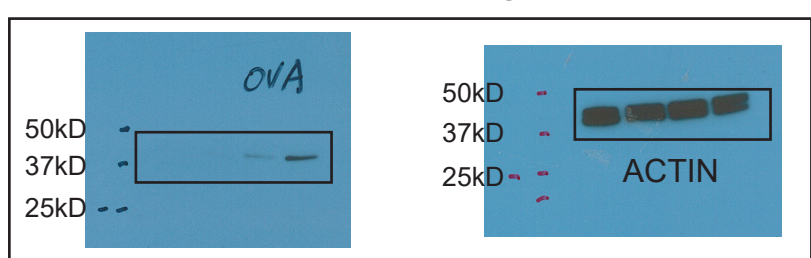

Supplement: NIHMS1518498-supplement-Supplementary_Figure_1.pdf [file NIHMS1518498-supplement-Supplementary_Figure_1.pdf]
